# Supplementary material
Source: PubMed Central journal article supplement (PMC4599003)
Supplement: supp_M115.673343_jbc.M115.673343-3.pdf [file supp_M115.673343_jbc.M115.673343-3.pdf]

**Death associated protein 3 regulates mitochondrial-encoded protein synthesis  
and mitochondrial dynamics**

**Lin Xiao, Hongxu Xian, Kit Yee Lee, Bin Xiao, Hongyan Wang,  
Fengwei Yu, Han-Ming Shen, Yih-Cherng Liou**

## **SUPPLEMENTAL INFORMATION**

### **Supplemental movie legends:**

**Movie S1. Association of GFP-Drp1 foci on mitochondria in control siRNA transfected cells.** HeLa cells stably expressing mito-Red were transfected with control-siRNA followed by overexpression of GFP-Drp1. Time-lapse images of mitochondria and GFP-Drp1 were acquired with an interval of 4 seconds for 60 time points. Scale bar: 1  $\mu\text{m}$ .

**Movie S2. Association of GFP-Drp1 foci on mitochondria in DAP3 siRNA transfected cells.** HeLa cells stably expressing mito-Red were transfected with DAP3-siRNA followed by overexpression of GFP-Drp1. Time-lapse images of mitochondria and GFP-Drp1 were acquired with an interval of 4 seconds for 60 time points. Scale bar: 1  $\mu\text{m}$ .
